# Supplementary material for: ATAC-Seq analysis reveals a widespread decrease of chromatin accessibility in age-related macular degeneration
Source: PubMed Central journal article supplement (PMC5893535; doi:10.1038/s41467-018-03856-y), 2018-04-10
Supplement: 41467_2018_3856_MOESM1_ESM.pdf [file 41467_2018_3856_MOESM1_ESM.pdf]

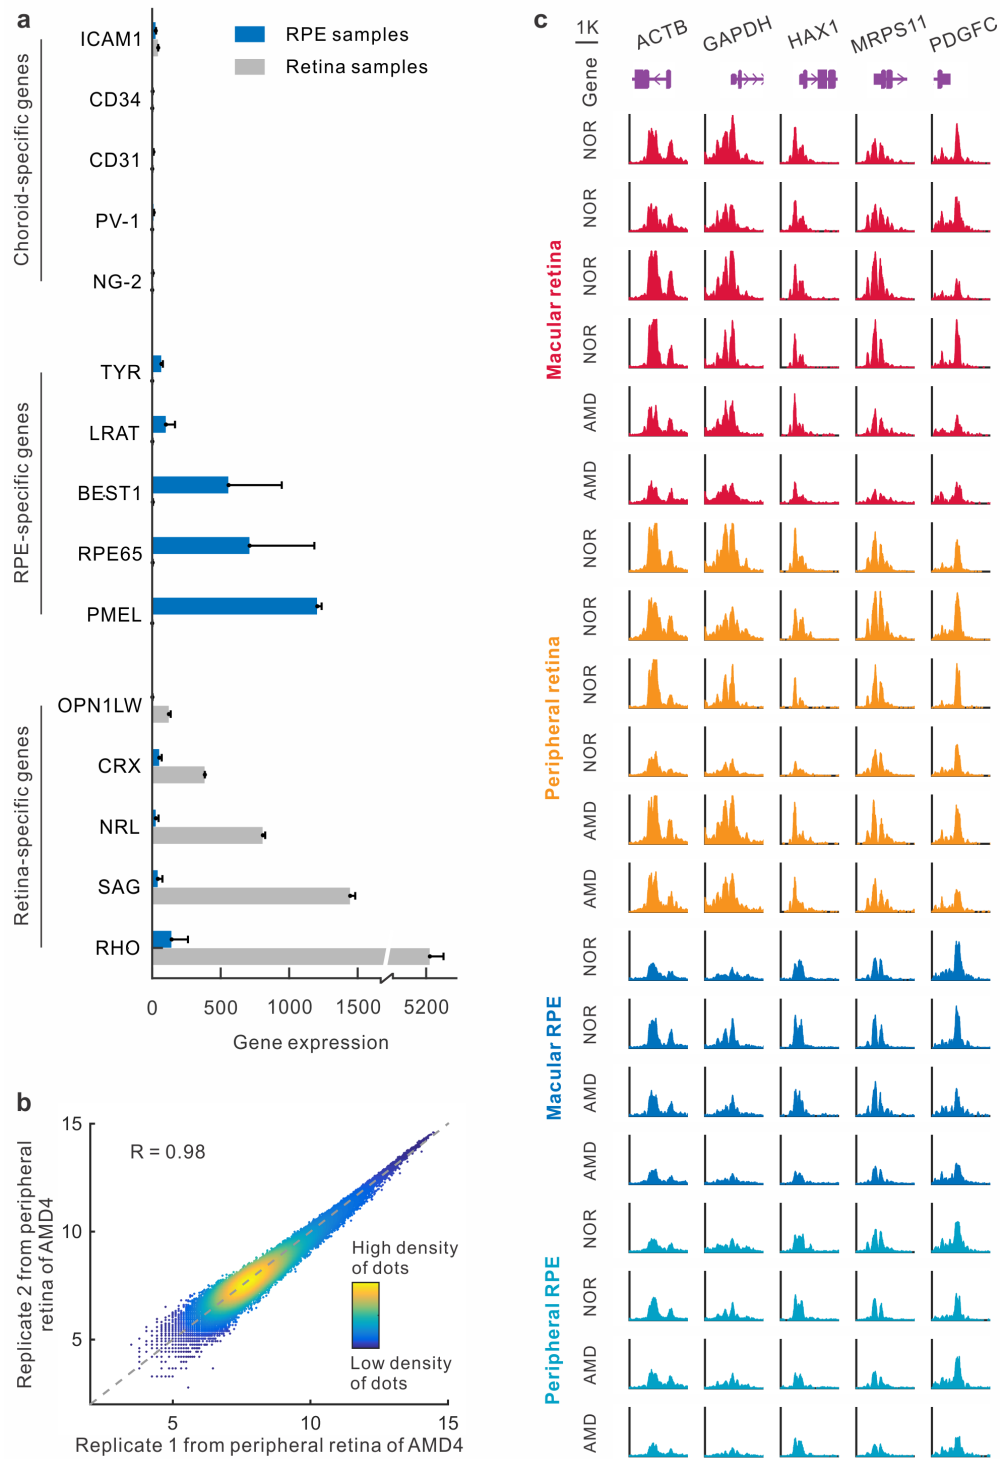

**Supplementary Figure 1.** Quality of retinal and RPE samples, and ATAC-Seq reproducibility. **(a)** Expression of tissue-specific genes in retina and RPE samples ( $n=2$ ). The error-bar represents the standard error of the mean. **(b)** ATAC-Seq comparison of the replicated samples from adjacent regions in peripheral retina of right eye from one AMD patient. **(c)** Examples of ATAC-Seq peaks associated with typical housekeeping genes.

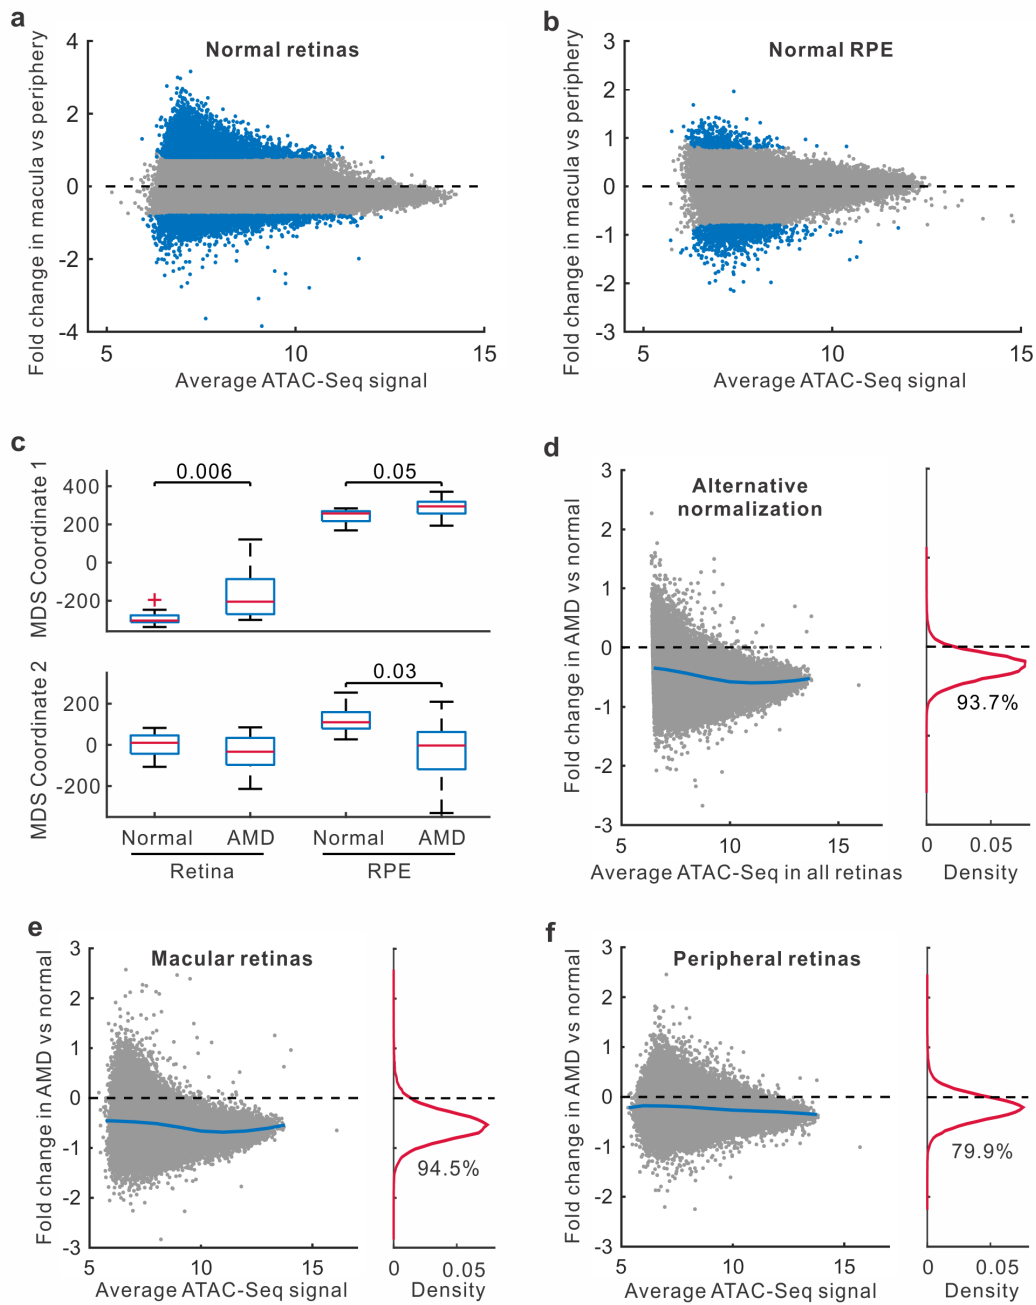

**Supplementary Figure 2.** Region-specific or disease specific changes in chromatin accessibility.

**(a-b)** Changes of chromatin accessibility in macular vs. matched periphery regions of retina ( $n = 4$ ) or RPE ( $n = 3$ ) from healthy donors. Blue dots represent peaks with significantly differential accessibility. **(c)** Comparison of the difference in MDS coordinates between normal and AMD samples. **(d)** Changes of chromatin accessibility in all normal and AMD retinas using alternative normalization, in which we used the number of the all properly paired fragments as the library size. **(e-f)** Changes of chromatin accessibility in AMD relative to normal in retina samples, with macular and peripheral regions analyzed separately. Each dot represents one ATAC-Seq peak. Blue line indicates average fold changes of peaks. The percentage of peaks with reduced ATAC-Seq signal in AMD is shown under the density curve.

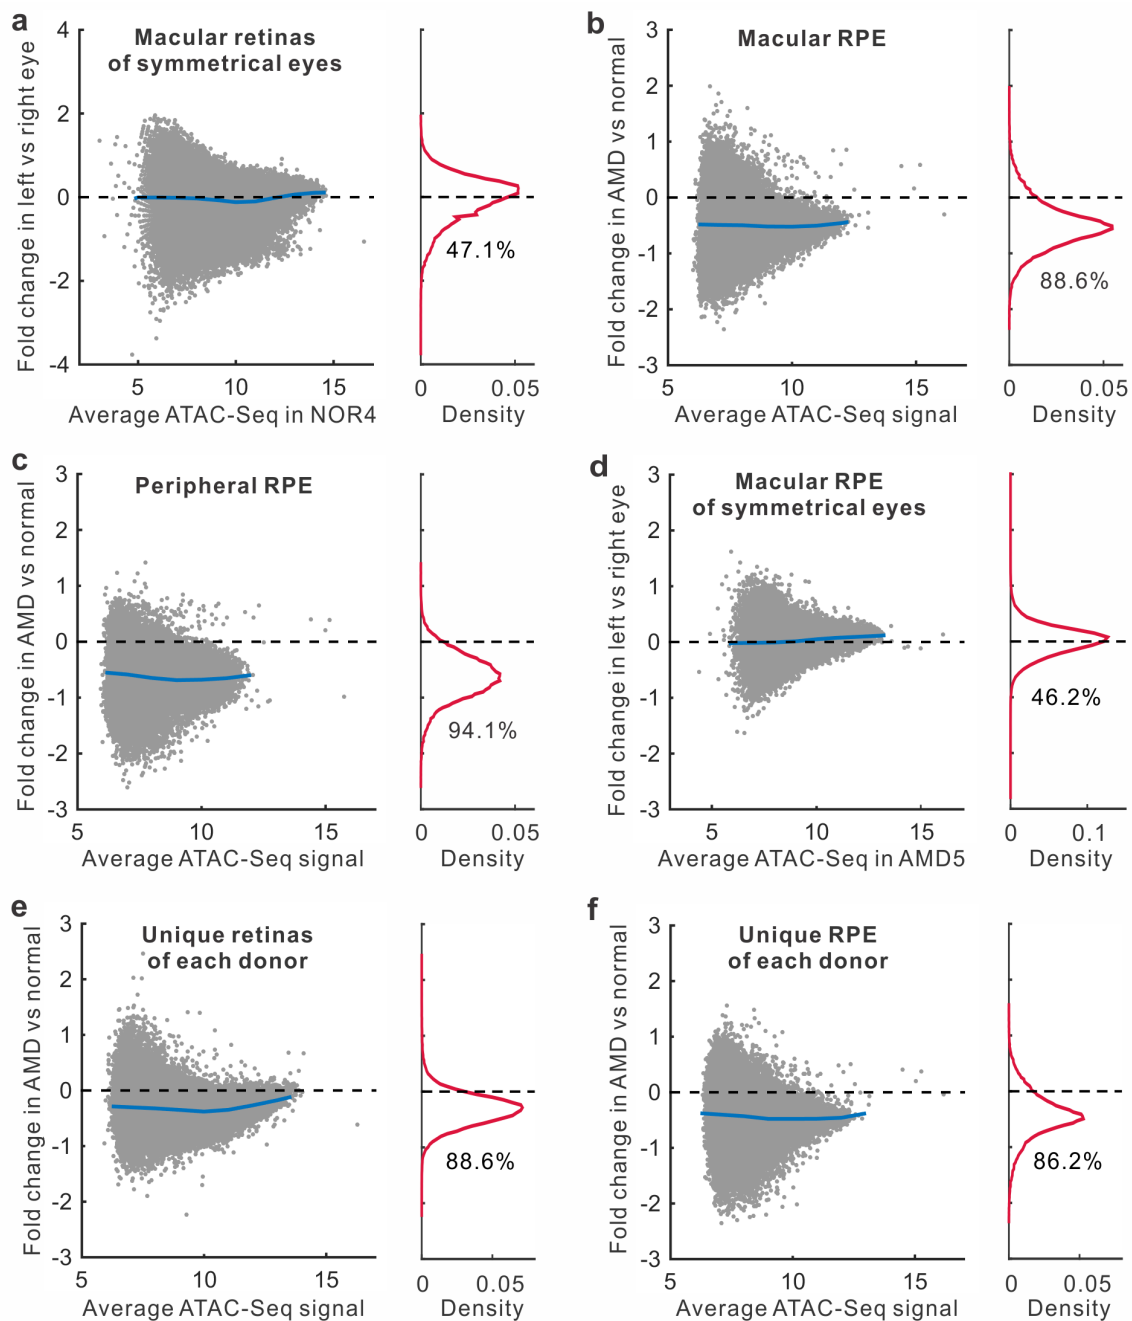

**Supplementary Figure 3.** Changes of chromatin accessibility in eyes from the same donor. **(a)** Changes of chromatin accessibility in macular retinas from the same donor whose eyes are at the same (symmetrical) stage of disease. Blue line represents the average change of ATAC-Seq peaks (gray dots). The percentage of peaks with the reduced accessibility is showed under the density curve in the right panel. **(b-c)** Changes of chromatin accessibility in AMD relative to normal in RPE samples from macular and peripheral regions, respectively. **(d)** Changes of chromatin accessibility in macular RPE from the same donor whose eyes are at the same stage of disease. **(e-f)** Changes of chromatin accessibility in AMD relative to normal samples. Only one sample was included from each donor.

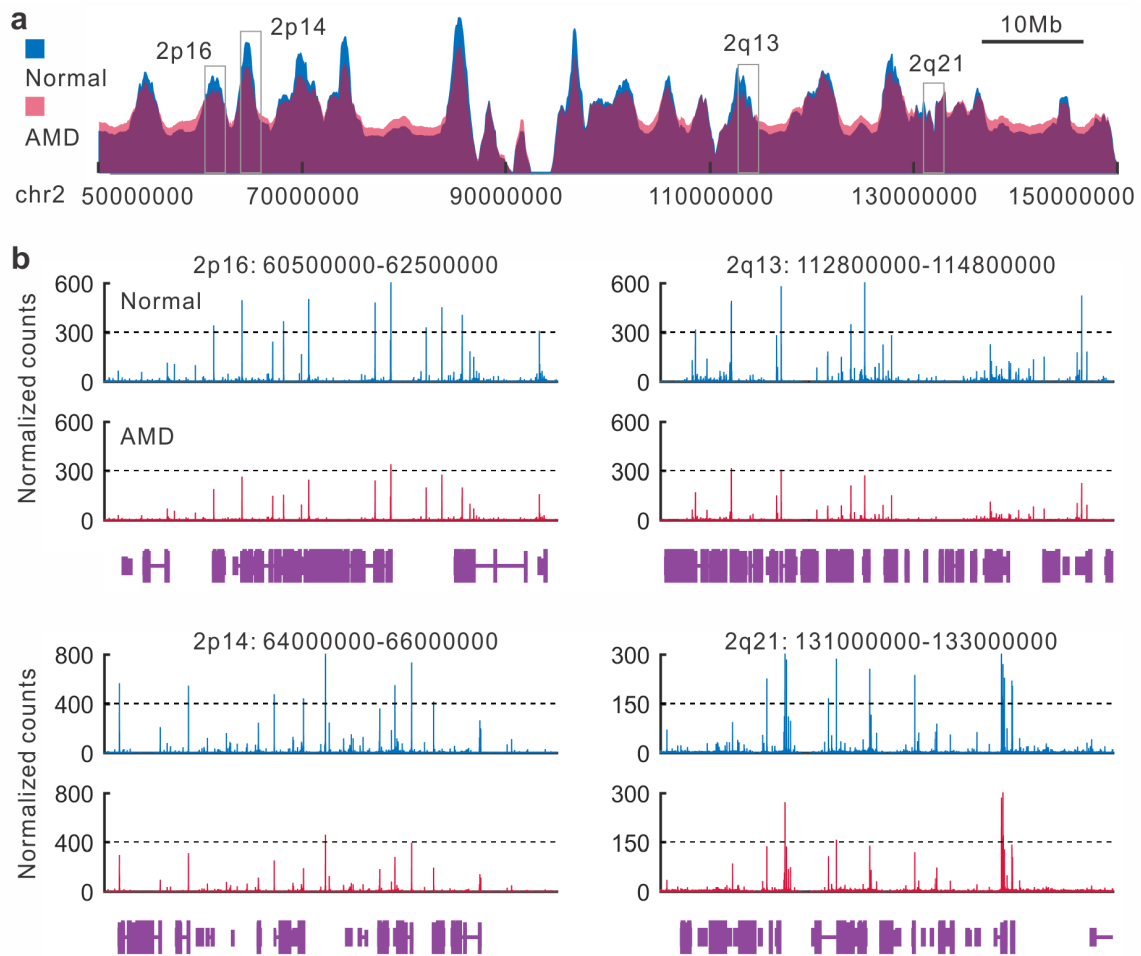

**Supplementary Figure 4.** Examples of large genomic domains with chromatin accessibility changes in the RPE. **(a)** Average ATAC-Seq intensity in AMD (red) and normal (blue) in a 100Mb genomic region. In this region, we can find many genomic domains (1-2Mb size), in which the ATAC-Seq signals in AMD samples are significantly lower than those in normal samples. **(b)** A few of these domains (2Mb each). The first three regions show the global reduction of ATAC-Seq signals in AMD, while the fourth example shows both reduced peaks in AMD and non-affected peaks.

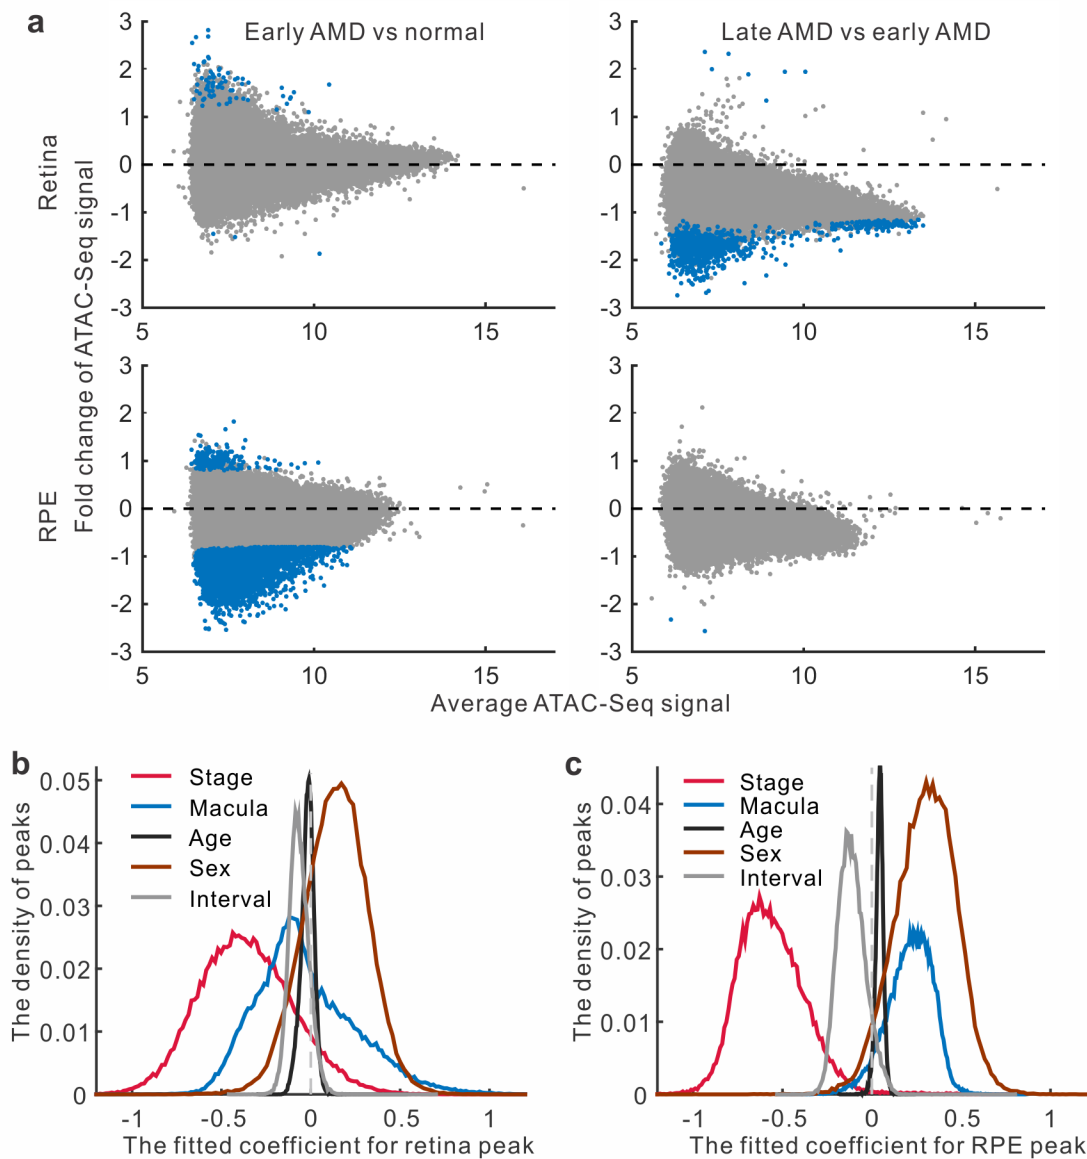

**Supplementary Figure 5.** Chromatin accessibility changes at different disease stages in the retina and RPE. **(a)** Changes of ATAC-Seq signal at different stages of AMD. The blue dots are peaks with significantly differential chromatin accessibility. **(b-c)** The distribution of the coefficients in the regression model of ATAC-Seq peaks from retina and RPE samples. For each ATAC-Seq peak, the coefficient of every variable was derived using the linear regression model.

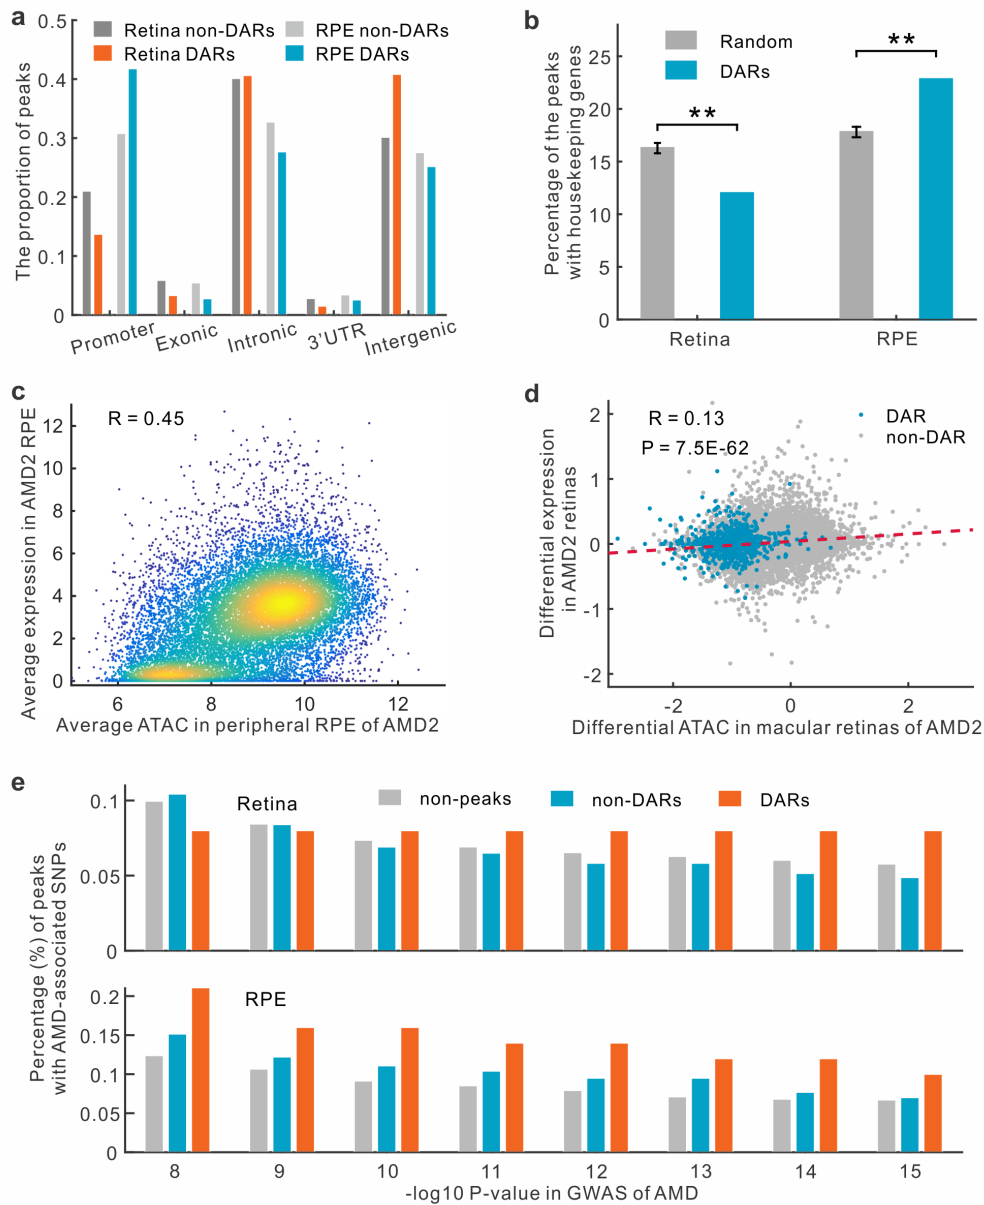

**Supplementary Figure 6.** Features and GWAS variants associated with differentially accessible regions (DARs). **(a)** The distribution of ATAC-Seq peaks at different genomic locations. **(b)** The percentage of DARs that are associated with housekeeping genes. The expectation from random set is from 5000 randomly selected ATAC-Seq peaks. Student's t-test was performed. Two asterisks indicate P-value < 0.01. **(c)** Comparison of chromatin accessibility and gene expression in the RPE of one AMD patient. Pearson's correlation coefficient (R) is shown. **(d)** Comparison of differential accessibility and differential expression in the retinas. The difference indicates the left eye (late-stage) relative to right eye (early-stage) of the AMD patient with asymmetric disease stages. **(e)** The percentage of ATAC-Seq peaks overlapped with significant GWAS SNPs. X-axis denotes the cutoff of GWAS significance. Non-peaks are the random regions outside the ATAC-Seq peaks. Non-DARs are the random ATAC-Seq peaks, which are not DARs.

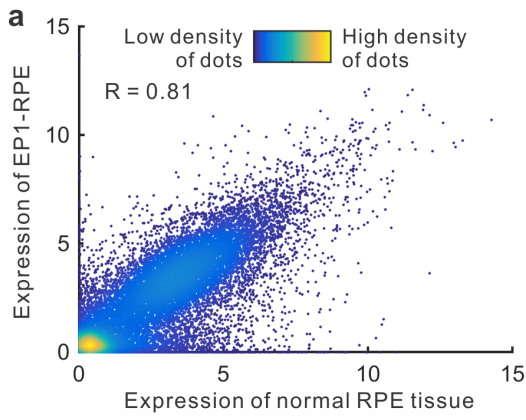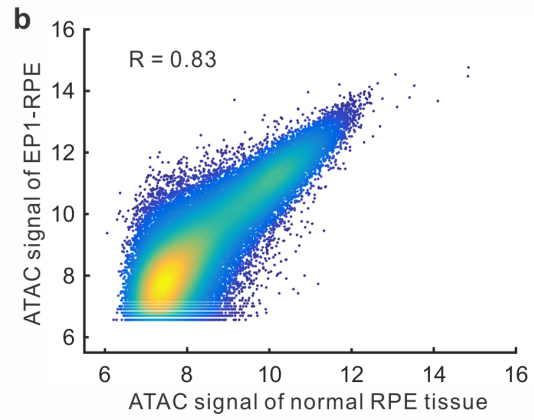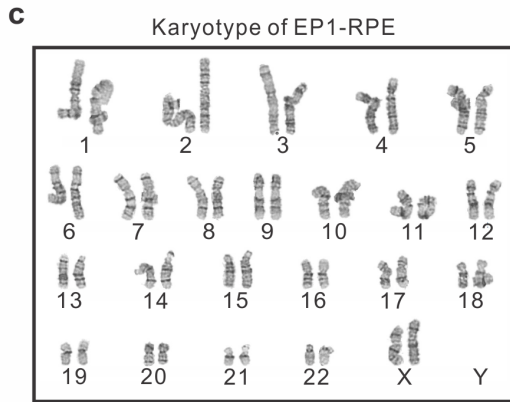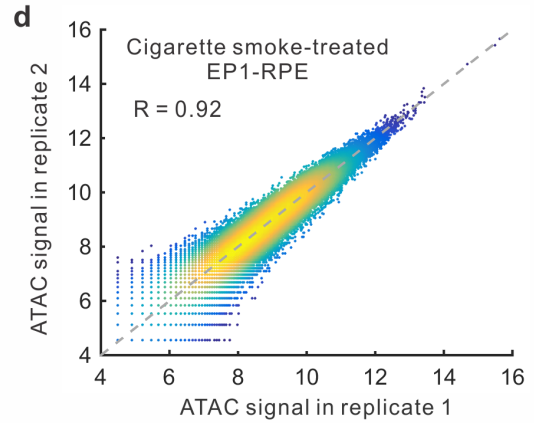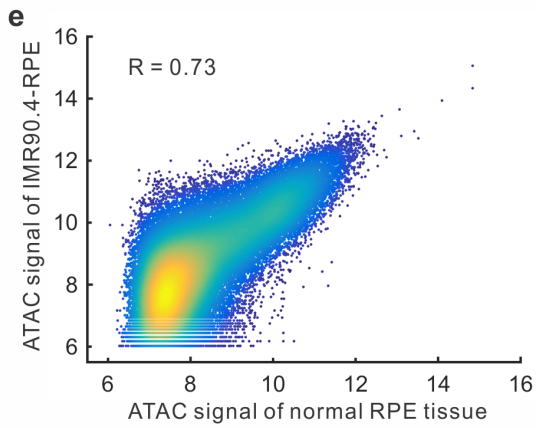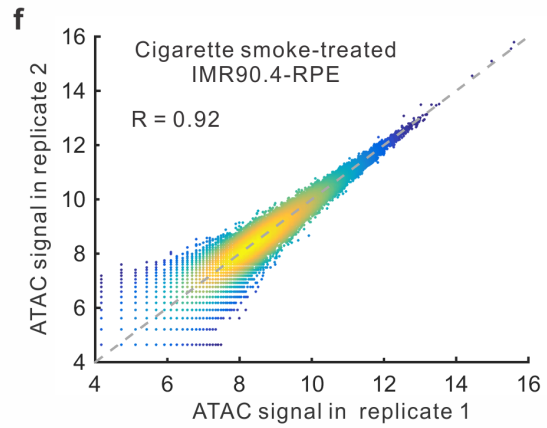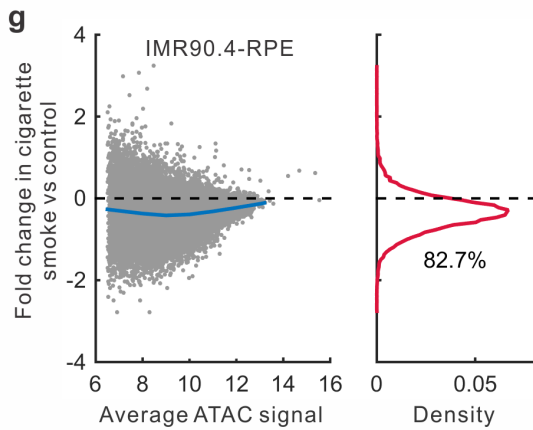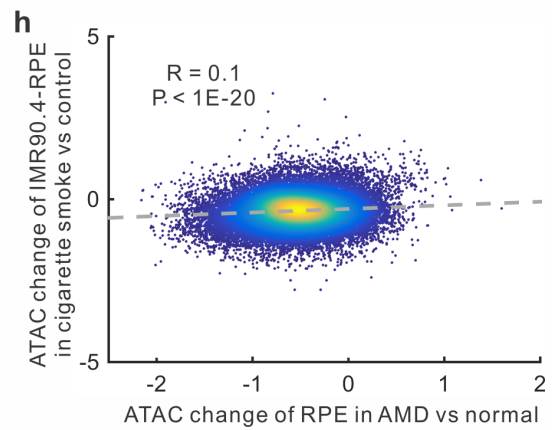

**Supplementary Figure 7.** Expression profile and chromatin accessibility of iPSC-derived RPE cells. **(a)** Comparison of RNA-Seq gene expression profiles between normal RPE samples (n = 8) and iPSC-derived RPE cells (EP1-RPE, n = 3). **(b)** Comparison of ATAC-Seq profiles between normal RPE samples and iPSC-RPE. **(c)** Karyotype of iPSC-RPE cells. The cells demonstrated an apparently normal karyotype. **(d)** Comparison of ATAC-Seq profiles from two biological replicates of cigarette smoke-treated RPE cells. **(e-h)** ATAC-Seq profiles of cigarette smoke treatment of one additional cell line (IMR90.4). **(e)** Comparison of chromatin accessibility between iPSC-RPE cells and normal RPE tissue. **(f)** Comparison of chromatin accessibility in two biological replicates of iPSC-RPE cells. **(g)** Changes in chromatin accessibility of RPE cells after cigarette smoke treatment. The blue line represents the average change in ATAC-Seq peaks. The percentage of peaks with the reduced chromatin accessibility is showed under the density curve in the right panel. **(h)** Comparison of changes in chromatin accessibility between cigarette smoke-treated RPE cells and RPE from AMD donors.



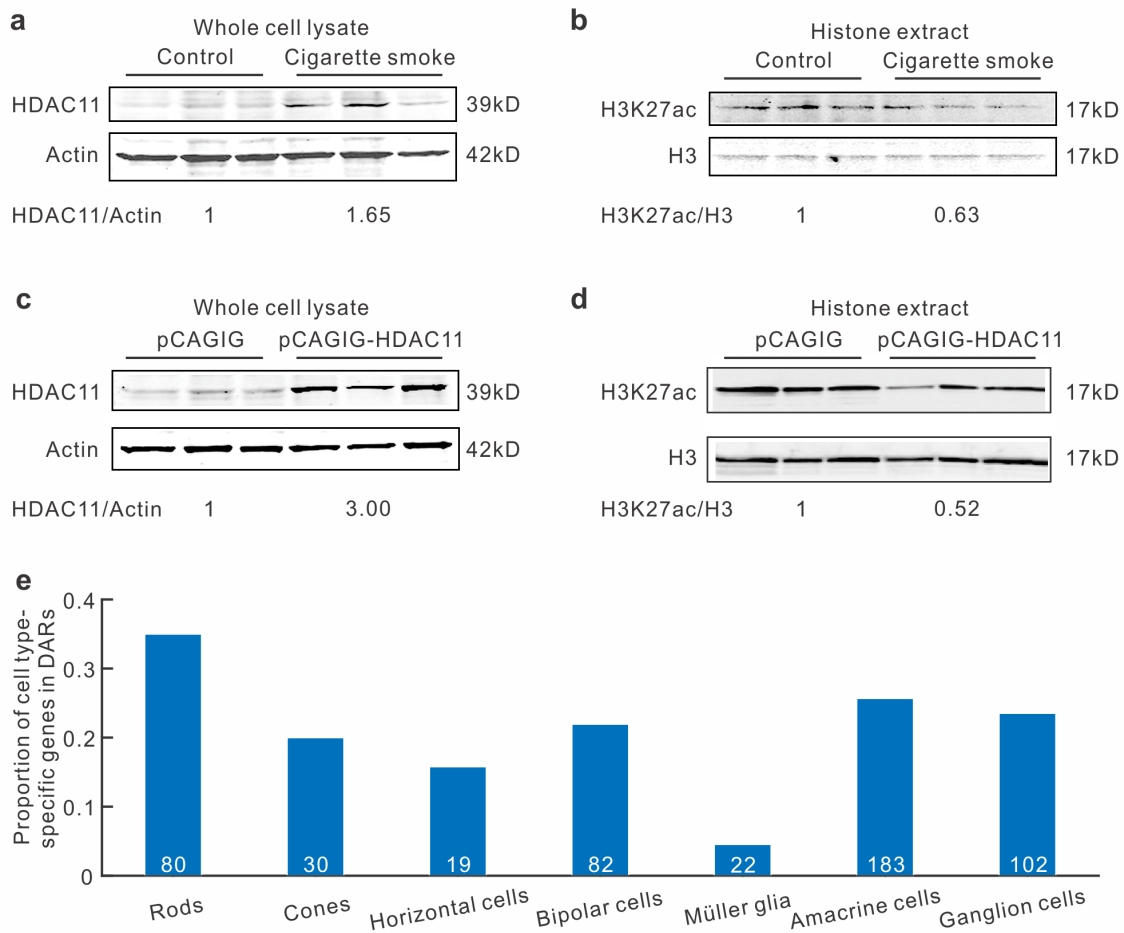

**Supplementary Figure 8.** *HDAC11* and H3K27ac levels change in iPSC-derived RPE cells treated with cigarette smoke. **(a)** Western blot of *HDAC11* following cigarette smoke treatment in human EP1-derived RPE cells. The number at the bottom of the image indicates the average abundance cross three lanes of each group. The average protein abundance in the control was normalized to 1. **(b)** Change of H3K27ac following cigarette smoke treatment. **(c)** *HDAC11* expression levels in cells overexpressing *Hdac11* (pCAGIG-*HDAC11*) compared with those in empty vector (pCAGIG). **(d)** Change of H3K27ac following *Hdac11* overexpression. The full Western blot images for **(a-d)** can be found in Supplementary Data 7. **(e)** The proportion of cell type-specific genes located in the retinal differentially accessible regions (DARs). The total number of cell type-specific genes in the study was shown at the bottom of the bar.

**Supplementary Table 1.** Donor characteristics

| Variable                          | Norm (n = 5) | AMD (n = 5)   | P value* |
|-----------------------------------|--------------|---------------|----------|
| Gender (male)                     | 2 (40%)      | 1 (20%)       | 0.41     |
| Age (years)                       | 84: 78 ~ 92  | 90: 85 ~ 95.5 | 0.24     |
| No. of total eyes:                |              |               |          |
| No. of paired eyes <sup>#</sup>   | 8: 6         | 8: 6          | 0.99     |
| Interval (hours) <sup>&amp;</sup> | 8.6          | 6             | 0.24     |

\*Fisher's exact test and Student's t-test were performed respectively. <sup>#</sup>The paired eyes are eyes from the same donors. <sup>&</sup>Interval indicates the time from death to procurement of eyes.

**Supplementary Table 2.** Statistics of ATAC-Seq for retina and RPE samples

| Sample*                  | Properly paired fragments (%)# | Qualified fragments& | Sample*             | Properly paired fragments (%)# | Qualified fragments& |
|--------------------------|--------------------------------|----------------------|---------------------|--------------------------------|----------------------|
| NOR1_Retina_MacR         | 95,198,063 (77.6)              | 56,151,841           | AMD5_Retina_MacR_LA | 36,530,166 (86.8)              | 22,515,903           |
| NOR1_Retina_PerL         | 30,375,713 (84.0)              | 23,357,162           | AMD5_Retina_PerR_LA | 61,929,860 (83.5)              | 47,717,112           |
| NOR1_Retina_PerR         | 66,360,580 (81.7)              | 41,210,030           | NOR2_RPE_Mac        | 62,240,653 (86.6)              | 38,332,398           |
| NOR2_Retina_Mac          | 47,063,121 (82.8)              | 31,460,883           | NOR2_RPE_PerL       | 83,058,819 (83.6)              | 44,954,984           |
| NOR2_Retina_Per          | 61,502,065 (85.6)              | 46,540,872           | NOR2_RPE_PerR       | 54,504,714 (73.5)              | 30,156,496           |
| NOR3_Retina_MacR         | 51,261,953 (84.2)              | 32,235,358           | NOR3_RPE_PerR       | 47,401,144 (83.3)              | 35,286,709           |
| NOR4_Retina_MacL         | 73,794,675 (77.9)              | 33,234,136           | NOR4_RPE_MacL       | 80,538,584 (70.6)              | 55,001,840           |
| NOR4_Retina_MacR         | 56,130,375 (79.4)              | 24,316,121           | NOR4_RPE_MacR       | 87,406,027 (73.3)              | 47,954,810           |
| NOR4_Retina_PerL         | 44,670,935 (79.4)              | 26,770,972           | NOR4_RPE_PerL       | 95,699,676 (69.6)              | 65,998,781           |
| NOR4_Retina_PerR         | 54,900,814 (76.3)              | 32,758,426           | NOR4_RPE_PerR       | 95,508,108 (68.1)              | 60,201,309           |
| NOR5_Retina_PerR         | 71,799,205 (90.5)              | 45,054,235           | AMD1_RPE_MacL_LA    | 46,657,027 (85.3)              | 31,307,075           |
| AMD1_Retina_MacL_LA      | 53,298,282 (81.3)              | 36,206,550           | AMD1_RPE_MacR_LA    | 63,649,499 (81.0)              | 36,630,371           |
| AMD1_Retina_MacR_LA      | 42,169,255 (82.0)              | 26,416,356           | AMD1_RPE_PerR_LA    | 57,068,660 (80.9)              | 38,720,478           |
| AMD1_Retina_PerR_LA      | 59,425,134 (85.1)              | 38,986,244           | AMD2_RPE_MacL_LA    | 80,189,619 (75.9)              | 41,553,090           |
| AMD2_Retina_MacL_LA      | 52,973,396 (76.4)              | 25,863,986           | AMD2_RPE_PerL_LA    | 64,525,397 (67.8)              | 35,411,272           |
| AMD2_Retina_MacR_EA      | 41,334,371 (75.6)              | 20,019,283           | AMD2_RPE_PerR_EA    | 65,795,447 (65.1)              | 39,301,200           |
| AMD2_Retina_PerL_LA      | 41,470,433 (77.4)              | 23,218,933           | AMD3_RPE_MacR_EA    | 72,938,776 (78.6)              | 31,369,459           |
| AMD2_Retina_PerR_EA      | 72,157,524 (69.2)              | 24,251,972           | AMD3_RPE_PerR_EA    | 68,690,135 (75.0)              | 32,083,977           |
| AMD3_Retina_PerR_EA      | 116,652,520 (86.1)             | 38,580,810           | AMD4_RPE_MacR_EA    | 32,335,897 (83.3)              | 20,123,768           |
| AMD4_Retina_MacR_EA      | 39,004,966 (83.0)              | 19,575,730           | AMD5_RPE_MacL_LA    | 57,902,954 (81.4)              | 36,203,385           |
| AMD4_Retina_PerR_EA_Rep1 | 51,899,554 (78.4)              | 38,903,055           | AMD5_RPE_MacR_LA    | 42,040,435 (82.3)              | 32,761,740           |
| AMD4_Retina_PerR_EA_Rep2 | 48,746,337 (79.7)              | 34,160,635           | AMD5_RPE_PerR_LA    | 48,591,576 (82.6)              | 48,591,576           |
| AMD5_Retina_MacL_LA      | 55,453,128 (85.5)              | 35,550,123           |                     |                                |                      |
| AMD5_Retina_PerL_LA      | 45,593,306 (86.1)              | 32,117,341           | Average             | 60,400,845 (78.5)              | 35,799,881           |

\*The sample ID contains the following information: disease status of donors (NOR: normal; AMD: AMD), type of tissue (Retina vs RPE), region (Mac: macula; Per: periphery), eye index (R: right eye; L: left eye), and disease stage (EA: early stage; LA: late stage). For the sample of AMD4\_Retina\_PerR, there are two biological replicates (Rep1 and Rep2). # The percentage in the bracket represents properly paired fragments as a percentage of total raw fragments. & fragments with MAPQ score > 10 after removing fragments from mitochondrial DNA and chromosome Y, as well as duplicate fragments.

**Supplementary Table 3.** TF motifs associated with footprints within DARs from retinas and RPE

| Transcription factor                          | Motif ID | FDR   |          |        | Transcription factor | Motif ID | FDR  |          |        |
|-----------------------------------------------|----------|-------|----------|--------|----------------------|----------|------|----------|--------|
|                                               |          | All   | Proximal | Distal |                      |          | All  | Proximal | Distal |
| <b>From footprints within DARs of retinas</b> |          |       |          |        |                      |          |      |          |        |
| OTX2                                          | M01719   | 7E-14 | 3E-3     | 3E-13  | CRX                  | M00623   | 1E-6 | 0.04     | 1E-6   |
| POU2F1                                        | M00138   | 2E-6  | 0.09     | 4E-7   | MEF2D                | M00941   | 1E-4 | 8E-3     | 0.07   |
| PAX6                                          | M01391   | 5E-4  | 0.57     | 6E-6   | FOXJ2                | M00422   | 7E-4 | 8E-3     | 0.34   |
| POU3F3                                        | M01324   | 1E-3  | 0.09     | 0.01   | TLX2                 | M01420   | 2E-3 | 0.23     | 3E-3   |
| CDC5L                                         | M00478   | 4E-3  | 0.01     | 0.63   | RORA                 | M00157   | 8E-3 | 0.14     | 0.12   |
| CUX1                                          | M01344   | 9E-3  | 6E-3     | 0.99   | RXRA                 | M01152   | 0.01 | 0.04     | 0.53   |
| FOXO3                                         | M01137   | 0.01  | 0.09     | 0.37   | VAX2                 | M01327   | 0.01 | 0.57     | 2E-3   |
| NKX3-1                                        | M00451   | 0.01  | 0.03     | 0.68   | PHOX2A               | M01444   | 0.01 | 0.53     | 2E-3   |
| MEIS1                                         | M00420   | 0.02  | 0.09     | 0.51   | POU6F1               | M00465   | 0.02 | 0.32     | 0.06   |
| ONECUT1,<br>ONECUT2                           | M00639   | 0.03  | 0.25     | 0.11   | IRX5                 | M01472   | 0.03 | 0.15     | 0.34   |
| ZBTB16                                        | M01075   | 0.04  | 0.08     | 0.90   | GTF2IRD1             | M01229   | 0.05 | 0.24     | 0.25   |
| <b>From footprints within DARs of RPE</b>     |          |       |          |        |                      |          |      |          |        |
| POU3F3                                        | M01324   | 2E-4  | 0.20     | 8E-8   | SOX5                 | M00042   | 2E-3 | 0.38     | 3E-9   |
| SOX4                                          | M01308   | 2E-3  | 0.02     | 0.07   | CTNNB1               | M03539   | 0.01 | 0.01     | 0.90   |
| POU2F1                                        | M00161   | 0.02  | 0.62     | 3E-6   | PITX2                | M01447   | 0.02 | 0.52     | 5E-5   |
| CUX1                                          | M00104   | 0.02  | 6E-4     | 0.99   | NKX3-1               | M00451   | 0.02 | 0.09     | 0.11   |
| CEBPG                                         | M00622   | 0.02  | 0.06     | 0.27   | OTX2                 | M01719   | 0.02 | 0.46     | 3E-4   |
| SATB1                                         | M01723   | 0.02  | 0.64     | 1E-5   | CDC5L                | M00478   | 0.04 | 0.61     | 3E-3   |
| TCF4                                          | M02033   | 0.04  | 0.13     | 0.21   |                      |          |      |          |        |

Based on their positions relative to the gene body, all peaks were divided into two groups: proximal and distal. We calculated the FDRs for proximal and distal peaks, respectively.

**Supplementary Table 4.** The expression of histone deacetylases in RPE tissue

| Gene   | Probe ID | Normal (n = 96) | AMD (n = 30) | Log2 fold change | P value     |
|--------|----------|-----------------|--------------|------------------|-------------|
| HDAC1  | 12245    | 8.56            | 8.53         | -0.04            | 0.54        |
| HDAC2  | 40294    | 8.67            | 8.59         | -0.08            | 0.30        |
| HDAC3  | 29325    | 3.90            | 3.94         | 0.04             | 0.61        |
| HDAC4  | 14394    | 5.49            | 5.61         | 0.12             | 0.20        |
| HDAC5  | 3947     | 7.66            | 7.55         | -0.11            | 0.23        |
| HDAC6  | 25939    | 7.59            | 7.53         | -0.06            | 0.39        |
| HDAC7  | 9457     | 9.34            | 9.33         | 0.00             | 0.97        |
| HDAC8  | 24646    | 4.15            | 4.20         | 0.04             | 0.61        |
| HDAC9  | 33494    | 2.52            | 2.61         | 0.09             | 0.45        |
| HDAC10 | 19616    | 3.53            | 3.24         | -0.29            | <b>0.02</b> |
| HDAC11 | 38006    | 4.17            | 4.41         | 0.24             | <b>0.05</b> |
| SIRT1  | 41246    | 5.34            | 5.10         | -0.24            | <b>0.02</b> |
| SIRT2  | 5854     | 6.08            | 5.99         | -0.09            | 0.24        |
| SIRT3  | 8468     | 7.32            | 7.46         | 0.14             | 0.13        |
| SIRT4  | 43993    | 3.13            | 3.13         | -0.01            | 0.97        |
| SIRT5  | 18987    | 6.31            | 6.18         | -0.13            | 0.14        |
| SIRT6  | 11898    | 5.17            | 5.19         | 0.02             | 0.76        |
| SIRT7  | 26965    | 6.66            | 6.55         | -0.11            | 0.25        |

Gene expression data were obtained from the microarray GSE29801. Both macular and peripheral RPE were included. Only dry AMD samples were used for this analysis.
