# Supplementary material for: ATAC-Seq analysis reveals a widespread decrease of chromatin accessibility in age-related macular degeneration
Source: PubMed Central journal article supplement (PMC5893535; doi:10.1038/s41467-018-03856-y), 2018-04-10
Supplement: 41467_2018_3856_MOESM3_ESM.pdf [file 41467_2018_3856_MOESM3_ESM.pdf]

## Description of Additional Supplementary Files

File Name: Supplementary Data 1

Description: ATAC-Seq peaks from all retinal samples

File Name: Supplementary Data 2

Description: ATAC-Seq peaks from all RPE samples

File Name: Supplementary Data 3

Description: Differential ATAC-Seq peaks of macular vs. peripheral retinal samples from normal eyes

File Name: Supplementary Data 4

Description: Differential ATAC-Seq peaks of macular vs. peripheral RPE samples from normal eyes

File Name: Supplementary Data 5

Description: Differentially accessible regions (DARs) in the retina identified by linear regression modeling of AMD and normal samples

File Name: Supplementary Data 6

Description: Differentially accessible regions (DARs) in the RPE identified by linear regression modeling of AMD and normal samples

File Name: Supplementary Data 7

Description: Full Western blot images for HDAC11 and H3K27ac in CSE treatment and HDAC11 overexpression cells.
